# Supplementary material for: The extent of postpartum cardiac reverse remodeling is reflected in urine proteome
Source: PubMed Central journal article supplement (PMC11211500; doi:10.1038/s41598-024-65612-1), 2024-06-27
Supplement: 41598_2024_65612_MOESM1_ESM.pdf [file 41598_2024_65612_MOESM1_ESM.pdf]

Supplemental Table 1: Echocardiographic equations applied in the present study.

| <b>Echocardiographic Variables</b> | <b>Equations</b>                                                                                        | <b>Unit</b> |
|------------------------------------|---------------------------------------------------------------------------------------------------------|-------------|
| LVM                                | $0.8 \times (1.04 \times [(LVEDd + PWd + IVSd)^3 - LVEDd^3] + 0.6)$                                     | g           |
| RWT                                | $2 \times PWd / LVEDd$                                                                                  | n/a         |
| Ejection fraction                  | $LVIDd^3 - LVIDs^3 / LVIDd^3 \times 100$                                                                | %           |
| LV cardiac output                  | <i>LV stroke volume x Heart rate</i>                                                                    | L/min       |
| Mean arterial pressure             | $(SBP + 2 \times DBP) / 3$                                                                              | mmHg        |
| E/e'                               | <i>E mitral inflow velocity / average of Early Diastolic Septal and Lateral mitral annular velocity</i> | n/a         |

Legend: CO – cardiac output; DBP – diastolic blood pressure; IVSd - interventricular septum thickness in diastole; LV – left ventricular; LVEDd - left ventricular end-diastolic diameter; LVIDd - left ventricular internal end-diastolic dimension; LVIDd - left ventricular internal end-systolic dimension; LVM – left ventricular mass; PWd - left ventricular posterior wall thickness in diastole; RWT – relative wall thickness; SBP – systolic blood pressure.

Supplemental Table 2: Urinary proteins identified through LC-MS/MS and included in pre-specified clinical variables multivariable GLMM for LVM.

| <b>Protein ID</b> | <b>Gene Name</b> | <b>N</b> | <b>Beta</b> | <b>95% CI<sup>1</sup></b> | <b>p-value</b> |
|-------------------|------------------|----------|-------------|---------------------------|----------------|
| P07911            | UMOD             | 118      | -1.7        | -4.9, 1.5                 | 0.3            |
| P0DOY2            | IGLC2            | 102      | -1.6        | -5.1, 2.0                 | 0.4            |
| P01619            | IGKV3-20         | 116      | 0.79        | -3.3, 4.9                 | 0.7            |
| P41222            | PTGDS            | 117      | -0.70       | -3.9, 2.5                 | 0.7            |
| P0DJ8             | PGA3             | 105      | -2.0        | -4.9, 0.94                | 0.2            |
| P01857            | IGHG1            | 117      | 2.1         | -2.8, 7.1                 | 0.4            |
| P01009            | SERPINA1         | 118      | 2.6         | -1.5, 6.7                 | 0.2            |
| P01876            | IGHA1            | 117      | -1.5        | -6.7, 3.6                 | 0.6            |
| P05154            | SERPINA5         | 118      | 0.82        | -2.2, 3.8                 | 0.6            |
| P62805            | HIST1H4A         | 99       | -1.5        | -3.2, 0.18                | 0.079          |
| P01042            | KNG1             | 118      | -3.5        | -7.7, 0.67                | 0.10           |
| P01011            | SERPINA3         | 118      | 0.32        | -3.4, 4.0                 | 0.9            |
| P05155            | SERPING1         | 118      | -1.9        | -6.9, 3.1                 | 0.5            |
| P10909            | CLU              | 118      | -1.3        | -5.2, 2.5                 | 0.5            |
| P08571            | CD14             | 118      | 0.38        | -3.5, 4.2                 | 0.8            |
| B9A064            | IPLL5            | 117      | -0.81       | -3.5, 1.9                 | 0.6            |
| P04083            | ANXA1            | 118      | -1.6        | -4.0, 0.79                | 0.2            |
| Q08380            | LGALS3BP         | 118      | -0.24       | -4.7, 4.2                 | >0.9           |
| Q01469            | FABP5            | 117      | -0.58       | -3.0, 1.9                 | 0.6            |
| P04746            | AMY2A            | 117      | -1.7        | -6.3, 2.9                 | 0.5            |
| Q9UBC9            | SPRR3            | 114      | -1.2        | -3.6, 1.1                 | 0.3            |
| P01833            | PIGR             | 117      | -1.3        | -6.7, 4.1                 | 0.6            |
| Q6EMK4            | VASN             | 116      | -4.1        | -9.0, 0.85                | 0.10           |
| P02787            | TF               | 118      | 4.6         | 1.5, 7.8                  | <b>0.004</b>   |
| P29508            | SERPINB3         | 118      | 0.90        | -1.8, 3.6                 | 0.5            |
| Q14624            | ITIH4            | 118      | 6.2         | 0.71, 12                  | <b>0.027</b>   |
| P02760            | AMBP             | 117      | 0.04        | -4.5, 4.5                 | >0.9           |
| P01133            | EGF              | 118      | -2.5        | -7.6, 2.7                 | 0.3            |
| P07355            | ANXA2            | 118      | -1.4        | -4.2, 1.3                 | 0.3            |
| P60709            | ACTB             | 118      | 2.9         | -2.8, 8.5                 | 0.3            |

| <b>Protein ID</b> | <b>Gene Name</b> | <b>N</b> | <b>Beta</b> | <b>95% CI<sup>1</sup></b> | <b>p-value</b> |
|-------------------|------------------|----------|-------------|---------------------------|----------------|
| P54802            | NAGLU            | 118      | -1.5        | -7.4, 4.3                 | 0.6            |
| P80188            | LCN2             | 111      | -0.64       | -3.2, 2.0                 | 0.6            |
| P10253            | GAA              | 118      | -1.3        | -6.4, 3.8                 | 0.6            |
| P01019            | AGT              | 116      | 0.91        | -2.3, 4.2                 | 0.6            |
| P24855            | DNASE1           | 116      | 1.1         | -3.7, 5.8                 | 0.7            |
| Q9UNN8            | PROCR            | 110      | -1.1        | -5.3, 3.2                 | 0.6            |
| Q13510            | ASAH1            | 118      | -4.1        | -12, 3.9                  | 0.3            |
| P07339            | CTSD             | 118      | -1.1        | -6.4, 4.2                 | 0.7            |
| P11117            | ACP2             | 117      | -0.40       | -6.4, 5.6                 | 0.9            |
| P10451            | SPP1             | 115      | -0.60       | -4.4, 3.2                 | 0.8            |
| P02647            | APOA1            | 115      | 0.61        | -1.4, 2.7                 | 0.6            |
| P05109            | S100A8           | 110      | -1.9        | -4.3, 0.58                | 0.13           |
| P05090            | APOD             | 110      | -4.3        | -9.0, 0.45                | 0.075          |
| P01871            | IGHM             | 116      | -0.64       | -4.1, 2.9                 | 0.7            |
| Q9NQ84            | GPRC5C           | 117      | 0.48        | -4.0, 5.0                 | 0.8            |
| O00560            | SDCBP            | 118      | 0.59        | -3.0, 4.2                 | 0.7            |
| Q96DA0            | ZG16B            | 113      | -2.5        | -6.5, 1.6                 | 0.2            |
| P15144            | ANPEP            | 118      | -0.12       | -6.7, 6.4                 | >0.9           |
| P16278            | GLB1             | 118      | -2.5        | -8.0, 3.0                 | 0.4            |
| P08185            | SERPINA6         | 116      | 1.7         | -2.7, 6.2                 | 0.4            |
| P00738            | HP               | 107      | -0.20       | -2.2, 1.8                 | 0.8            |
| P19835            | CEL              | 118      | -0.24       | -4.9, 4.4                 | >0.9           |
| Q12805            | EFEMP1           | 117      | 0.41        | -4.5, 5.3                 | 0.9            |
| P30086            | PEBP1            | 115      | -3.6        | -8.9, 1.7                 | 0.2            |
| P07195            | LDHB             | 118      | -0.80       | -6.4, 4.7                 | 0.8            |
| Q8NFZ8            | CADM4            | 111      | -2.0        | -7.0, 3.0                 | 0.4            |
| P15586            | GNS              | 118      | -2.5        | -7.3, 2.3                 | 0.3            |
| Q9NZZ3            | CHMP5            | 109      | -1.8        | -6.6, 3.0                 | 0.5            |
| P05543            | SERPINA7         | 117      | -4.6        | -9.6, 0.42                | 0.072          |
| P02790            | HPX              | 111      | 2.0         | -1.0, 5.1                 | 0.2            |
| P02671            | FGA              | 108      | 0.96        | -1.7, 3.7                 | 0.5            |

| Protein ID | Gene Name | N   | Beta  | 95% CI <sup>1</sup> | p-value      |
|------------|-----------|-----|-------|---------------------|--------------|
| P00450     | CP        | 118 | -1.0  | -4.5, 2.4           | 0.6          |
| P22891     | PROZ      | 116 | 0.47  | -3.6, 4.6           | 0.8          |
| P05062     | ALDOB     | 115 | -0.10 | -4.5, 4.3           | >0.9         |
| P16444     | DPEP1     | 118 | -0.21 | -5.3, 4.9           | >0.9         |
| P53990     | IST1      | 117 | 0.86  | -4.0, 5.7           | 0.7          |
| P25311     | AZGP1     | 114 | -2.1  | -5.1, 0.79          | 0.2          |
| P30740     | SERPINB1  | 115 | -0.90 | -3.4, 1.6           | 0.5          |
| P12109     | COL6A1    | 117 | -0.26 | -5.9, 5.4           | >0.9         |
| Q7LBR1     | CHMP1B    | 108 | -1.8  | -5.8, 2.2           | 0.4          |
| Q9Y646     | CPQ       | 118 | -1.0  | -6.3, 4.2           | 0.7          |
| P06733     | ENO1      | 118 | 1.8   | -2.4, 6.1           | 0.4          |
| P15309     | ACPP      | 115 | 0.98  | -2.8, 4.8           | 0.6          |
| P02649     | APOE      | 117 | -0.57 | -5.8, 4.6           | 0.8          |
| O43633     | CHMP2A    | 111 | 0.69  | -3.5, 4.9           | 0.7          |
| P12830     | CDH1      | 114 | -1.8  | -5.3, 1.8           | 0.3          |
| O60494     | CUBN      | 118 | -3.8  | -9.2, 1.5           | 0.2          |
| P04217     | A1BG      | 105 | -2.4  | -5.8, 1.0           | 0.2          |
| Q93088     | BHMT      | 115 | -0.98 | -4.5, 2.6           | 0.6          |
| P01024     | C3        | 118 | 2.3   | 0.37, 4.3           | <b>0.020</b> |
| P19440     | GGT1      | 116 | -0.19 | -5.8, 5.4           | >0.9         |
| P08294     | SOD3      | 96  | -0.34 | -5.3, 4.6           | 0.9          |
| P63104     | YWHAZ     | 116 | 0.89  | -4.2, 6.0           | 0.7          |
| P31949     | S100A11   | 98  | -1.9  | -5.9, 2.2           | 0.4          |
| Q14019     | COTL1     | 94  | -0.53 | -3.9, 2.8           | 0.8          |
| P09210     | GSTA2     | 95  | -1.4  | -5.4, 2.6           | 0.5          |
| P04004     | VTN       | 114 | 0.92  | -1.7, 3.6           | 0.5          |
| Q969P0     | IGSF8     | 117 | 2.2   | -2.7, 7.0           | 0.4          |
| P33908     | MAN1A1    | 115 | 1.9   | -1.7, 5.6           | 0.3          |
| P04075     | ALDOA     | 118 | -2.0  | -6.5, 2.4           | 0.4          |
| P39059     | COL15A1   | 113 | -2.0  | -6.1, 2.1           | 0.3          |
| Q16769     | QPCT      | 100 | 0.30  | -5.2, 5.8           | >0.9         |

| <b>Protein ID</b> | <b>Gene Name</b> | <b>N</b> | <b>Beta</b> | <b>95% CI<sup>1</sup></b> | <b>p-value</b> |
|-------------------|------------------|----------|-------------|---------------------------|----------------|
| Q9NZP8            | C1RL             | 113      | -4.8        | -11, 0.98                 | 0.10           |
| Q16270            | IGFBP7           | 97       | 1.2         | -2.3, 4.8                 | 0.5            |
| P14618            | PKM              | 117      | -1.5        | -6.1, 3.2                 | 0.5            |
| Q01459            | CTBS             | 112      | -2.7        | -6.7, 1.4                 | 0.2            |
| P00918            | CA2              | 116      | -0.27       | -5.6, 5.1                 | >0.9           |
| P98164            | LRP2             | 118      | -1.1        | -6.6, 4.4                 | 0.7            |
| P50995            | ANXA11           | 115      | 1.5         | -2.1, 5.0                 | 0.4            |
| P0C0L5            | C4B              | 118      | 2.4         | -1.3, 6.0                 | 0.2            |
| Q9UBX5            | FBLN5            | 117      | 1.9         | -4.0, 7.7                 | 0.5            |
| P01008            | SERPINC1         | 116      | 0.04        | -3.5, 3.6                 | >0.9           |
| P05156            | CFI              | 113      | 0.27        | -4.4, 4.9                 | >0.9           |
| O95336            | PGLS             | 116      | -0.14       | -5.1, 4.8                 | >0.9           |
| P62879            | GNB2             | 111      | -5.8        | -12, 0.32                 | 0.063          |
| P15941            | MUC1             | 111      | -2.6        | -7.9, 2.7                 | 0.3            |
| P02750            | LRG1             | 107      | -1.2        | -4.3, 1.8                 | 0.4            |
| P26038            | MSN              | 118      | 0.84        | -4.3, 5.9                 | 0.7            |
| O75882            | ATRN             | 118      | -1.7        | -6.8, 3.5                 | 0.5            |
| P27105            | STOM             | 116      | 0.18        | -6.5, 6.8                 | >0.9           |
| P00338            | LDHA             | 113      | -0.30       | -5.5, 4.9                 | >0.9           |
| P27487            | DPP4             | 118      | 0.00        | -6.0, 6.0                 | >0.9           |
| P22792            | CPN2             | 112      | -0.86       | -6.1, 4.4                 | 0.7            |
| P08758            | ANXA5            | 115      | 0.86        | -3.3, 5.0                 | 0.7            |
| P98160            | HSPG2            | 118      | 1.1         | -4.1, 6.2                 | 0.7            |
| P07737            | PFN1             | 97       | 5.2         | -0.22, 11                 | 0.060          |
| Q9UHL4            | DPP7             | 113      | -0.75       | -5.5, 4.0                 | 0.8            |
| P12429            | ANXA3            | 109      | -1.2        | -3.6, 1.3                 | 0.3            |
| Q07075            | ENPEP            | 117      | -0.29       | -4.1, 3.5                 | 0.9            |
| A8K2U0            | A2ML1            | 116      | -0.18       | -2.3, 1.9                 | 0.9            |
| P29622            | SERPINA4         | 118      | 0.18        | -4.4, 4.8                 | >0.9           |
| Q92820            | GGH              | 108      | -1.6        | -7.1, 3.8                 | 0.6            |
| Q6UX06            | OLFM4            | 116      | -0.94       | -6.1, 4.2                 | 0.7            |

| <b>Protein ID</b> | <b>Gene Name</b> | <b>N</b> | <b>Beta</b> | <b>95% CI<sup>1</sup></b> | <b>p-value</b> |
|-------------------|------------------|----------|-------------|---------------------------|----------------|
| P00558            | PGK1             | 116      | 2.2         | -1.8, 6.3                 | 0.3            |
| P09467            | FBP1             | 113      | 0.04        | -4.1, 4.2                 | >0.9           |
| P13473            | LAMP2            | 105      | 0.10        | -3.8, 4.0                 | >0.9           |
| Q8WUM4            | PDCD6IP          | 118      | -0.49       | -4.8, 3.8                 | 0.8            |
| P60174            | TPI1             | 115      | 2.6         | -2.7, 8.0                 | 0.3            |
| Q06830            | PRDX1            | 106      | -2.4        | -8.4, 3.5                 | 0.4            |
| P78324            | SIRPA            | 115      | -2.0        | -5.8, 1.9                 | 0.3            |
| P43251            | BTD              | 115      | 2.6         | -4.0, 9.2                 | 0.4            |
| Q5VW32            | BROX             | 112      | -1.3        | -6.7, 4.1                 | 0.6            |
| P23284            | PPIB             | 106      | 0.12        | -6.1, 6.3                 | >0.9           |
| Q9NP79            | VTA1             | 107      | 2.3         | -3.1, 7.7                 | 0.4            |
| P08236            | GUSB             | 109      | -2.0        | -7.2, 3.1                 | 0.4            |
| P08473            | MME              | 118      | 1.6         | -4.6, 7.7                 | 0.6            |
| P01023            | A2M              | 112      | 1.8         | -0.26, 3.9                | 0.085          |
| Q9H3G5            | CPVL             | 113      | 1.7         | -2.9, 6.2                 | 0.5            |
| P52758            | HRSP12           | 100      | -1.1        | -5.9, 3.7                 | 0.7            |
| P15289            | ARSA             | 116      | 1.3         | -3.4, 5.9                 | 0.6            |
| P07686            | HEXB             | 118      | -2.3        | -8.6, 4.0                 | 0.5            |
| Q92692            | PVRL2            | 110      | -2.1        | -8.4, 4.1                 | 0.5            |
| P04066            | FUCA1            | 114      | -2.4        | -9.5, 4.7                 | 0.5            |
| Q9UKU9            | ANGPTL2          | 111      | 0.95        | -3.4, 5.3                 | 0.7            |
| P09525            | ANXA4            | 117      | -0.84       | -6.2, 4.6                 | 0.8            |
| P68104            | EEF1A1           | 102      | 1.0         | -4.1, 6.2                 | 0.7            |
| P35858            | IGFALS           | 114      | 0.77        | -3.3, 4.8                 | 0.7            |
| P11597            | CETP             | 105      | -0.36       | -3.8, 3.1                 | 0.8            |
| P36955            | SERPINF1         | 118      | 2.6         | -1.1, 6.2                 | 0.2            |
| P06865            | HEXA             | 116      | -3.8        | -9.9, 2.3                 | 0.2            |
| P23528            | CFL1             | 99       | -0.96       | -7.6, 5.7                 | 0.8            |
| P62834            | RAP1A            | 104      | -0.41       | -5.7, 4.9                 | 0.9            |
| Q9H8L6            | MMRN2            | 112      | 4.2         | -1.0, 9.4                 | 0.11           |
| P53634            | CTSC             | 113      | -1.2        | -7.1, 4.7                 | 0.7            |

| Protein ID | Gene Name | N   | Beta  | 95% CI <sup>1</sup> | p-value      |
|------------|-----------|-----|-------|---------------------|--------------|
| P04899     | GNAI2     | 105 | -2.6  | -8.3, 3.0           | 0.4          |
| Q9BRK3     | MXRA8     | 109 | -0.48 | -4.1, 3.1           | 0.8          |
| P40925     | MDH1      | 103 | 0.93  | -5.0, 6.9           | 0.8          |
| O00391     | QSOX1     | 118 | 2.5   | -1.9, 7.0           | 0.3          |
| P13796     | LCP1      | 102 | 0.25  | -1.8, 2.3           | 0.8          |
| Q8IV08     | PLD3      | 103 | -3.7  | -11, 3.5            | 0.3          |
| P09211     | GSTP1     | 100 | 8.3   | 2.5, 14             | <b>0.005</b> |
| P32119     | PRDX2     | 102 | -2.9  | -9.1, 3.4           | 0.4          |
| P30530     | AXL       | 105 | 1.6   | -3.1, 6.3           | 0.5          |
| P15311     | EZR       | 117 | -4.0  | -9.7, 1.8           | 0.2          |
| P58499     | FAM3B     | 97  | -1.0  | -6.8, 4.7           | 0.7          |
| P14384     | CPM       | 104 | 2.5   | -3.3, 8.3           | 0.4          |
| P11142     | HSPA8     | 118 | 3.1   | -2.5, 8.8           | 0.3          |
| P00352     | ALDH1A1   | 117 | -2.1  | -6.6, 2.3           | 0.3          |
| P02751     | FN1       | 118 | 8.0   | 1.9, 14             | <b>0.011</b> |
| P51654     | GPC3      | 113 | 0.87  | -3.2, 4.9           | 0.7          |
| P00966     | ASS1      | 106 | 0.60  | -2.6, 3.8           | 0.7          |
| P26992     | CNTFR     | 100 | -3.2  | -8.6, 2.3           | 0.3          |
| Q6UX73     | C16orf89  | 115 | 3.8   | -0.95, 8.5          | 0.12         |
| P09668     | CTSH      | 107 | 5.2   | 0.26, 10            | <b>0.039</b> |
| P17174     | GOT1      | 116 | -2.8  | -8.6, 2.9           | 0.3          |
| Q12860     | CNTN1     | 117 | 0.60  | -3.3, 4.5           | 0.8          |
| O75351     | VPS4B     | 104 | 3.7   | -1.7, 9.0           | 0.2          |
| P42785     | PRCP      | 103 | -2.9  | -9.8, 4.1           | 0.4          |
| Q8WZ75     | ROBO4     | 114 | 0.58  | -3.0, 4.1           | 0.7          |
| Q9H0W9     | C11orf54  | 113 | -2.8  | -7.4, 1.9           | 0.2          |
| P63000     | RAC1      | 97  | 1.4   | -5.6, 8.3           | 0.7          |
| Q12794     | HYAL1     | 113 | 0.76  | -4.1, 5.7           | 0.8          |
| P37837     | TALDO1    | 99  | -1.4  | -4.1, 1.3           | 0.3          |
| P00751     | CFB       | 101 | 2.4   | -0.50, 5.2          | 0.10         |
| P06727     | APOA4     | 105 | 1.2   | -1.3, 3.7           | 0.4          |

| Protein ID | Gene Name | N   | Beta  | 95% CI <sup>1</sup> | p-value      |
|------------|-----------|-----|-------|---------------------|--------------|
| Q9BYE9     | CDHR2     | 116 | -2.9  | -7.0, 1.2           | 0.2          |
| Q5JS37     | NHLRC3    | 94  | -4.1  | -9.2, 1.0           | 0.11         |
| P04406     | GAPDH     | 108 | 1.7   | -4.1, 7.5           | 0.6          |
| O14773     | TPP1      | 116 | 0.95  | -4.0, 5.9           | 0.7          |
| P84077     | ARF1      | 100 | 10    | 2.6, 18             | <b>0.009</b> |
| Q03154     | ACY1      | 99  | 0.98  | -2.5, 4.4           | 0.6          |
| P60953     | CDC42     | 110 | 5.9   | 1.2, 11             | <b>0.014</b> |
| Q13621     | SLC12A1   | 115 | -0.69 | -5.2, 3.9           | 0.8          |
| O43505     | B4GAT1    | 107 | -0.35 | -5.2, 4.5           | 0.9          |
| Q99519     | NEU1      | 99  | -5.2  | -11, 0.76           | 0.087        |
| O43490     | PROM1     | 115 | -1.4  | -6.2, 3.4           | 0.6          |
| Q9HB40     | SCPEP1    | 102 | -1.7  | -6.6, 3.3           | 0.5          |
| Q9H444     | CHMP4B    | 100 | 1.0   | -4.7, 6.8           | 0.7          |
| O43451     | MGAM      | 116 | 0.67  | -3.0, 4.3           | 0.7          |
| O00462     | MANBA     | 117 | -0.43 | -3.9, 3.1           | 0.8          |
| Q8NBJ4     | GOLM1     | 106 | -1.9  | -4.8, 0.98          | 0.2          |
| P19801     | AOC1      | 107 | 0.53  | -2.8, 3.8           | 0.8          |
| P0DMV9     | HSPA1B    | 118 | 2.7   | -3.0, 8.4           | 0.3          |
| O43895     | XPNP2     | 103 | -0.10 | -3.7, 3.5           | >0.9         |
| Q9HBB8     | CDHR5     | 113 | -1.6  | -6.3, 3.2           | 0.5          |
| P00491     | PNP       | 112 | -2.1  | -7.2, 3.1           | 0.4          |
| Q13228     | SELENBP1  | 115 | -0.29 | -5.6, 5.0           | >0.9         |
| O75874     | IDH1      | 113 | -1.8  | -6.2, 2.6           | 0.4          |
| P16152     | CBR1      | 112 | 1.3   | -3.8, 6.4           | 0.6          |
| Q96KP4     | CNDP2     | 112 | 0.16  | -3.4, 3.7           | >0.9         |
| P08195     | SLC3A2    | 115 | -0.52 | -7.4, 6.3           | 0.9          |
| Q16651     | PRSS8     | 95  | -2.2  | -9.3, 4.8           | 0.5          |
| P51688     | SGSH      | 101 | 0.01  | -5.3, 5.3           | >0.9         |
| Q15907     | RAB11B    | 106 | -0.29 | -7.6, 7.0           | >0.9         |
| P55287     | CDH11     | 97  | -1.8  | -4.5, 0.95          | 0.2          |
| Q14914     | PTGR1     | 113 | -0.57 | -6.2, 5.1           | 0.8          |



| <b>Protein ID</b> | <b>Gene Name</b> | <b>N</b> | <b>Beta</b> | <b>95% CI<sup>1</sup></b> | <b>p-value</b> |
|-------------------|------------------|----------|-------------|---------------------------|----------------|
| P14550            | AKR1A1           | 109      | 1.9         | -2.1, 5.9                 | 0.3            |
| P51149            | RAB7A            | 101      | 2.8         | -5.2, 11                  | 0.5            |
| Q9H6X2            | ANTXR1           | 102      | -1.2        | -5.6, 3.2                 | 0.6            |
| P43121            | MCAM             | 111      | -3.9        | -8.3, 0.39                | 0.074          |
| P52209            | PGD              | 109      | 1.4         | -2.5, 5.2                 | 0.5            |
| Q8NCC3            | PLA2G15          | 106      | -0.21       | -5.7, 5.3                 | >0.9           |
| P40121            | CAPG             | 112      | 1.8         | -3.9, 7.6                 | 0.5            |
| Q9HCN6            | GP6              | 96       | -1.8        | -7.1, 3.5                 | 0.5            |
| P12277            | CKB              | 103      | 3.6         | -1.2, 8.4                 | 0.14           |
| P34059            | GALNS            | 105      | -0.87       | -5.8, 4.0                 | 0.7            |
| Q96PD5            | PGLYRP2          | 107      | -1.4        | -4.7, 1.9                 | 0.4            |
| P68371            | TUBB4B           | 112      | 3.6         | -0.90, 8.1                | 0.12           |
| P29992            | GNA11            | 102      | 2.1         | -3.3, 7.6                 | 0.4            |
| P11021            | HSPA5            | 115      | 1.7         | -3.3, 6.6                 | 0.5            |
| P14543            | NID1             | 95       | -0.93       | -5.2, 3.4                 | 0.7            |
| P06744            | GPI              | 115      | 3.0         | -1.6, 7.6                 | 0.2            |
| P51148            | RAB5C            | 100      | 1.7         | -5.6, 9.0                 | 0.6            |
| P34896            | SHMT1            | 104      | 0.13        | -4.0, 4.3                 | >0.9           |
| Q3LXA3            | DAK              | 109      | 0.28        | -3.4, 4.0                 | 0.9            |
| Q9UGT4            | SUSD2            | 103      | 2.4         | -3.9, 8.6                 | 0.5            |
| O00241            | SIRPB1           | 101      | -0.87       | -6.0, 4.3                 | 0.7            |
| P54760            | EPHB4            | 111      | -3.3        | -9.0, 2.3                 | 0.2            |
| P08697            | SERPINF2         | 112      | -1.9        | -6.0, 2.2                 | 0.4            |
| P61106            | RAB14            | 111      | -0.40       | -8.8, 8.0                 | >0.9           |
| Q8NHP8            | PLBD2            | 108      | 1.3         | -5.7, 8.4                 | 0.7            |
| P55017            | SLC12A3          | 112      | 2.9         | -1.5, 7.3                 | 0.2            |
| P55290            | CDH13            | 113      | 0.43        | -5.3, 6.1                 | 0.9            |
| P19827            | ITIH1            | 112      | 2.6         | -0.86, 6.2                | 0.14           |
| P09603            | CSF1             | 107      | -3.3        | -9.7, 3.1                 | 0.3            |
| Q92520            | FAM3C            | 104      | 1.4         | -4.5, 7.3                 | 0.6            |
| P50395            | GDI2             | 109      | 3.5         | -1.9, 8.9                 | 0.2            |

| Protein ID | Gene Name | N   | Beta  | 95% CI <sup>1</sup> | p-value      |
|------------|-----------|-----|-------|---------------------|--------------|
| Q08345     | DDR1      | 109 | -7.0  | -14, 0.23           | 0.058        |
| Q14393     | GAS6      | 117 | -0.42 | -6.0, 5.1           | 0.9          |
| O00533     | CHL1      | 110 | -0.92 | -4.5, 2.7           | 0.6          |
| P48594     | SERPINB4  | 104 | -1.1  | -3.7, 1.5           | 0.4          |
| Q9Y2E5     | MAN2B2    | 113 | 0.05  | -3.7, 3.8           | >0.9         |
| Q08174     | PCDH1     | 95  | -0.29 | -4.1, 3.5           | 0.9          |
| P04180     | LCAT      | 109 | -4.8  | -10, 0.44           | 0.072        |
| P07900     | HSP90AA1  | 111 | 2.2   | -1.3, 5.7           | 0.2          |
| P06280     | GLA       | 110 | -6.4  | -12, -0.34          | <b>0.039</b> |
| P05546     | SERPIND1  | 95  | 3.3   | -0.05, 6.6          | 0.053        |
| Q99816     | TSG101    | 101 | 3.4   | -1.5, 8.3           | 0.2          |
| Q8IUL8     | CILP2     | 117 | -1.9  | -8.3, 4.5           | 0.6          |
| O75487     | GPC4      | 110 | 2.3   | -2.7, 7.3           | 0.4          |
| P18085     | ARF4      | 98  | 2.7   | -3.4, 8.8           | 0.4          |
| P08582     | MFI2      | 111 | -0.70 | -5.6, 4.2           | 0.8          |
| Q9UKU6     | TRHDE     | 112 | 2.9   | -2.2, 8.0           | 0.3          |
| P20711     | DDC       | 102 | 1.8   | -1.9, 5.6           | 0.3          |
| Q12913     | PTPRJ     | 114 | -2.1  | -6.5, 2.3           | 0.3          |
| Q9UIB8     | CD84      | 109 | -0.75 | -5.7, 4.2           | 0.8          |
| P35052     | GPC1      | 109 | 0.96  | -6.0, 7.9           | 0.8          |
| Q8N271     | PROM2     | 109 | -2.4  | -8.1, 3.3           | 0.4          |
| Q9H6S3     | EPS8L2    | 101 | -0.86 | -4.8, 3.1           | 0.7          |
| Q96NY8     | PVRL4     | 96  | -4.8  | -11, 1.2            | 0.12         |
| Q6UVK1     | CSPG4     | 113 | 0.22  | -4.4, 4.8           | >0.9         |
| P02748     | C9        | 95  | 1.7   | -2.6, 6.0           | 0.4          |
| P20073     | ANXA7     | 110 | 3.6   | -1.9, 9.1           | 0.2          |
| P31946     | YWHAB     | 96  | -2.8  | -9.4, 3.7           | 0.4          |
| P50502     | ST13      | 104 | -1.6  | -7.6, 4.4           | 0.6          |
| O95497     | VNN1      | 98  | -3.4  | -8.8, 1.9           | 0.2          |
| O00299     | CLIC1     | 99  | 0.44  | -7.2, 8.1           | >0.9         |
| Q9HAT2     | SIAE      | 102 | -8.4  | -16, -1.2           | <b>0.023</b> |

| Protein ID | Gene Name | N   | Beta  | 95% CI <sup>1</sup> | p-value      |
|------------|-----------|-----|-------|---------------------|--------------|
| P08183     | ABCB1     | 114 | 0.09  | -4.4, 4.6           | >0.9         |
| Q12929     | EPS8      | 106 | -0.56 | -4.5, 3.3           | 0.8          |
| Q9H223     | EHD4      | 106 | 0.93  | -3.4, 5.3           | 0.7          |
| P50895     | BCAM      | 110 | -1.8  | -7.3, 3.8           | 0.5          |
| P07384     | CAPN1     | 98  | -2.1  | -5.3, 1.1           | 0.2          |
| P05023     | ATP1A1    | 115 | 5.0   | 0.35, 9.6           | <b>0.035</b> |
| O43493     | TGOLN2    | 107 | -4.6  | -8.3, -0.83         | <b>0.017</b> |
| Q00796     | SORD      | 94  | 2.0   | -3.6, 7.7           | 0.5          |
| P15313     | ATP6V1B1  | 95  | 0.02  | -4.0, 4.0           | >0.9         |
| O43707     | ACTN4     | 109 | 1.4   | -1.6, 4.5           | 0.3          |
| P38606     | ATP6V1A   | 101 | 3.0   | -1.2, 7.1           | 0.2          |
| Q9Y6W3     | CAPN7     | 108 | -0.15 | -3.8, 3.5           | >0.9         |
| Q5JWF2     | GNAS      | 100 | -3.6  | -12, 4.6            | 0.4          |
| P12821     | ACE       | 109 | -1.1  | -5.7, 3.5           | 0.6          |
| Q86YQ8     | CPNE8     | 102 | 1.9   | -5.3, 9.1           | 0.6          |
| P08572     | COL4A2    | 109 | 2.9   | -2.0, 7.8           | 0.2          |
| P29401     | TKT       | 98  | 3.8   | 0.25, 7.3           | <b>0.036</b> |
| O00159     | MYO1C     | 106 | -0.97 | -5.0, 3.1           | 0.6          |
| P61019     | RAB2A     | 98  | 0.01  | -7.9, 8.0           | >0.9         |
| Q16706     | MAN2A1    | 109 | 2.5   | -2.0, 7.0           | 0.3          |
| P35241     | RDX       | 103 | -0.82 | -5.8, 4.1           | 0.7          |
| Q9BYF1     | ACE2      | 108 | 0.48  | -5.9, 6.8           | 0.9          |
| Q92673     | SORL1     | 115 | -2.9  | -7.9, 2.1           | 0.2          |
| Q13332     | PTPRS     | 115 | 1.9   | -2.1, 5.8           | 0.4          |
| P55786     | NPEPPS    | 99  | 0.17  | -5.0, 5.3           | >0.9         |
| P54753     | EPHB3     | 109 | -2.4  | -9.2, 4.5           | 0.5          |
| Q7Z7M0     | MEGF8     | 118 | 0.24  | -5.4, 5.9           | >0.9         |
| P36871     | PGM1      | 98  | 2.7   | -1.6, 7.0           | 0.2          |
| Q92896     | GLG1      | 101 | 1.4   | -3.4, 6.3           | 0.6          |
| P13797     | PLS3      | 104 | -0.23 | -5.9, 5.5           | >0.9         |
| POCOL4     | C4A       | 110 | 2.2   | -1.0, 5.5           | 0.2          |

| <b>Protein ID</b> | <b>Gene Name</b> | <b>N</b> | <b>Beta</b> | <b>95% CI<sup>1</sup></b> | <b>p-value</b> |
|-------------------|------------------|----------|-------------|---------------------------|----------------|
| P12111            | COL6A3           | 116      | -0.68       | -4.0, 2.6                 | 0.7            |
| O75339            | CILP             | 106      | -2.3        | -7.5, 2.9                 | 0.4            |
| Q9UQB8            | BAIAP2           | 98       | -1.5        | -5.8, 2.7                 | 0.5            |
| P18206            | VCL              | 105      | -2.4        | -6.1, 1.2                 | 0.2            |
| Q5SZK8            | FREM2            | 108      | 1.1         | -2.2, 4.5                 | 0.5            |
| O00468            | AGRN             | 106      | 0.55        | -3.7, 4.8                 | 0.8            |
| Q99523            | SORT1            | 101      | -8.5        | -15, -1.6                 | <b>0.017</b>   |
| P23470            | PTPRG            | 98       | -3.2        | -8.8, 2.3                 | 0.3            |
| P22314            | UBA1             | 98       | 4.5         | 0.35, 8.6                 | <b>0.034</b>   |
| Q14126            | DSG2             | 96       | -6.9        | -13, -1.2                 | <b>0.019</b>   |
| P32004            | L1CAM            | 105      | -3.5        | -7.9, 0.84                | 0.11           |
| Q6V0I7            | FAT4             | 107      | 0.51        | -2.5, 3.5                 | 0.7            |
| P22105            | TNXB             | 104      | 0.60        | -4.9, 6.1                 | 0.8            |
| Q09666            | AHNAK            | 96       | -2.2        | -4.1, -0.38               | <b>0.019</b>   |
| P11717            | IGF2R            | 99       | -2.8        | -8.0, 2.3                 | 0.3            |

<sup>1</sup>CI = Confidence Interval
